# Supplementary material for: Relaxometric properties and biocompatibility of a novel nanostructured fluorinated gadolinium metal–organic framework
Source: Royal Society of Chemistry journal article supplement (doi:10.1039/d4dt02134g), 2024-01-01
Supplement: d4dt02134g1.pdf [file d4dt02134g1.pdf]

Supporting Information

**Relaxometric Properties and Biocompatibility of a Novel Nanostructured Fluorinated Gadolinium Metal-Organic Framework**

Letizia Trovarelli <sup>\*a#</sup>, Alessandra Mirarchi <sup>b#</sup>, Cataldo Arcuri <sup>b\*</sup>, Stefano Bruscoli <sup>b</sup>, Oxana Bereshchenko <sup>b</sup>, Marta Febo <sup>b</sup>, Fabio Carniato <sup>\*c</sup>, Ferdinando Costantino <sup>\*a</sup>

a. Department of Chemistry, Biology and Biotechnologies, University of Perugia

Via Elce Di Sotto n 8, 06123, Perugia, Italy

b. Department of Medicine and Surgery, University of Perugia

Piazza Lucio Severi n 1, 06132 Perugia, Italy

c. Department of Science and Technology, University of Eastern Piedmont "A.Avogadro"

Viale Teresa Michel 11, 15121, Perugia, Italy

| Identification code                        | GdF4BDC                                                  |
|--------------------------------------------|----------------------------------------------------------|
| Empirical formula                          | C15 H8 F6 Gd N O8                                        |
| Formula weight                             | 601.47                                                   |
| Temperature (K)                            | 293(2)                                                   |
| Wavelength (Å)                             | 0.71069                                                  |
| Crystal System                             | monoclinic                                               |
| Space Group                                | P 21/a                                                   |
| Unit Cell Dimensions (Å, °)                | a=7.7894(2), b=21.8151(6)<br>c=10.1789(3)<br>β=98.800(1) |
| Volume (Å <sup>3</sup> )                   | 1709.30(8)                                               |
| Z                                          | 4                                                        |
| Density (calculated) (Mg/m <sup>3</sup> )  | 2.337                                                    |
| Absorption coefficient (mm <sup>-1</sup> ) | 3.994                                                    |
| F(000)                                     | 1148                                                     |
| Crystal size (mm)                          | 0.57 x 0.12 x 0.10                                       |
| Theta range for data collection (°)        | 2.236 to 30.560                                          |
| Index ranges                               | -11 ≤ h ≤ 11,<br>-31 ≤ k ≤ 31,<br>-14 ≤ l ≤ 14           |
| Reflections collected                      | 5243                                                     |
| Independent reflections                    | 38028 [R(int) = 0.0478]                                  |
| Completeness                               | 99.8 % (to theta= 30.560°)                               |
| Refinement method                          | Full-matrix least-squares on F <sup>2</sup>              |
| Data / restraints / parameters             | 4683 / 2 / 288                                           |
| Goodness-of-fit on F <sup>2</sup>          | 1.111                                                    |
| Final R indices [I > 2σ(I)]                | R1 = 0.0247, wR2 = 0.0577                                |

**Table S1.** Crystallographic data for **GdF4BDC**

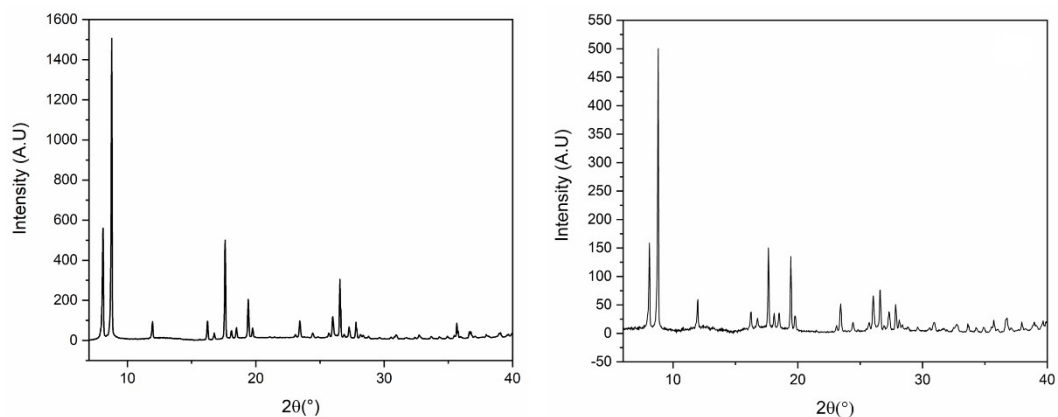

**Figure S1:** PXRD patterns of Gd-F<sub>4</sub>BDC nanoparticles obtained using: (sx) CTABr (Cetyltrimethylammonium Bromide) and (dx) Acetic acid as modulators.

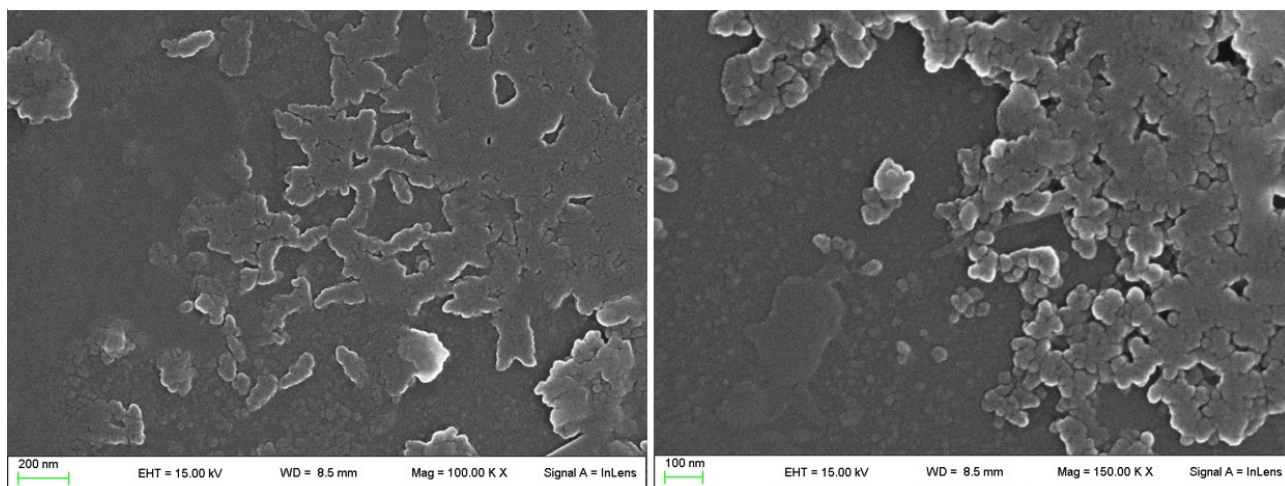

**Figure S2:** SEM images of Gd-F<sub>4</sub>BDC nanoparticles obtained using CTABr (Cetyltrimethylammonium Bromide) as modulator.

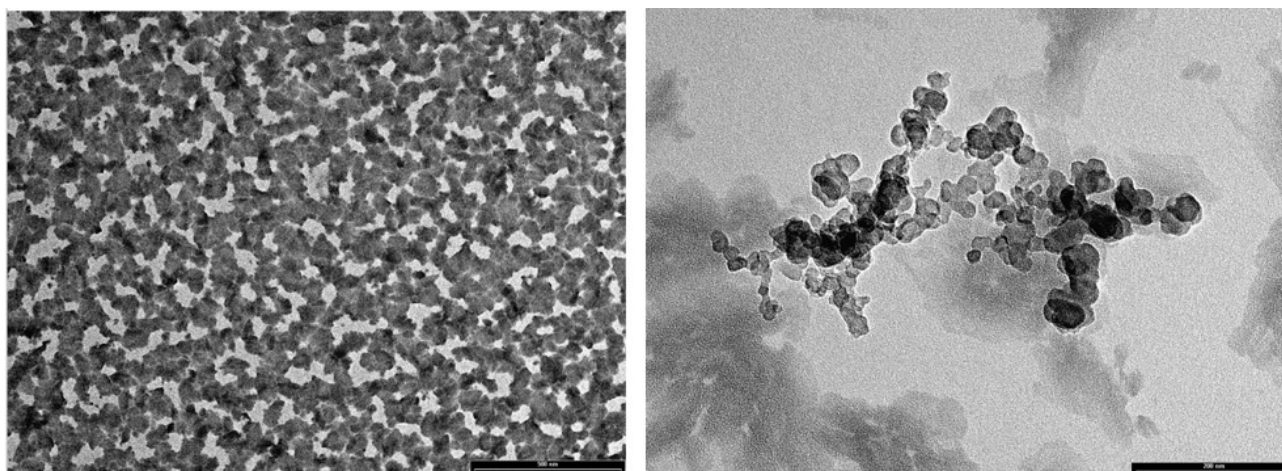

**Figure S3:** TEM images of Gd-F<sub>4</sub>BDC nanoparticles obtained using CTABr (Cetyltrimethylammonium Bromide) as modulator.

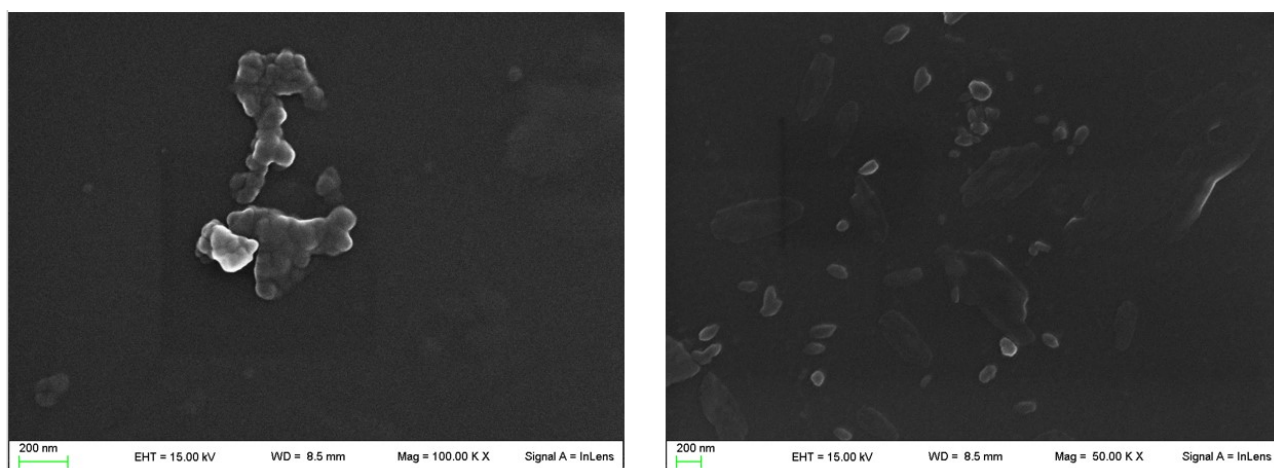

**Figure S4:** SEM images of Gd-F<sub>4</sub>BDC nanoparticles obtained using A.A (Acetic acid) as modulator.

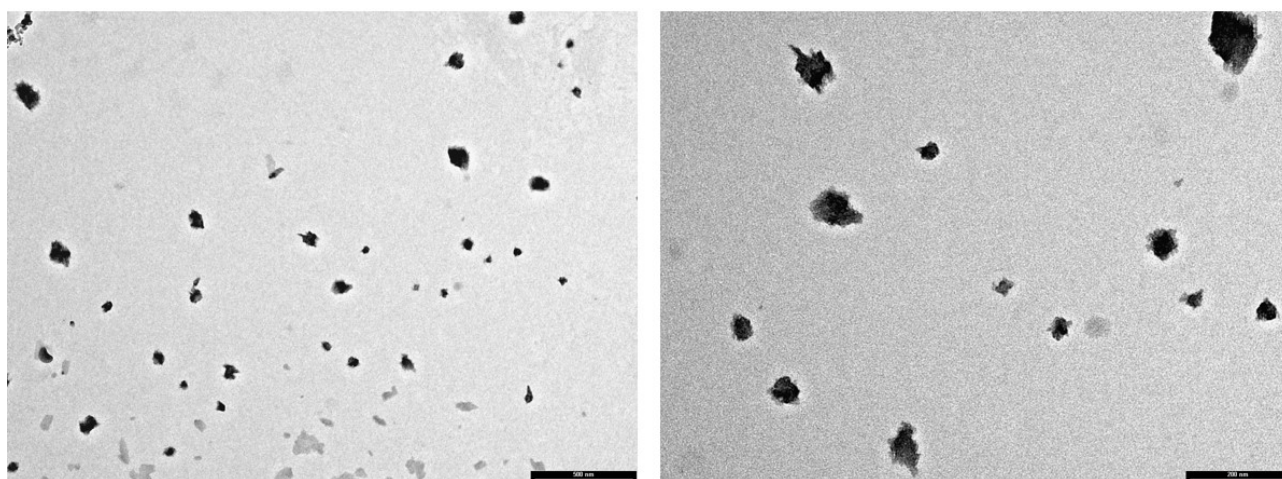

**Figure S5:** TEM images of Gd-F<sub>4</sub>BDC nanoparticles obtained using A.A (Acetic acid) as modulator.

|                       | Gd <sup>3+</sup> (ppm) | V (mL) | % Gd <sup>3+</sup> <sub>diss</sub> / Gd <sup>3+</sup> <sub>tot</sub> |
|-----------------------|------------------------|--------|----------------------------------------------------------------------|
| Gd-F <sub>4</sub> BDC | 0.09968                | 5      | 0.02 %                                                               |

**Table S2:** Gd<sup>3+</sup> leaching evaluated from ICP-OES: Gd<sup>3+</sup> concentration in ppm, sample volume and the metal percentage released.

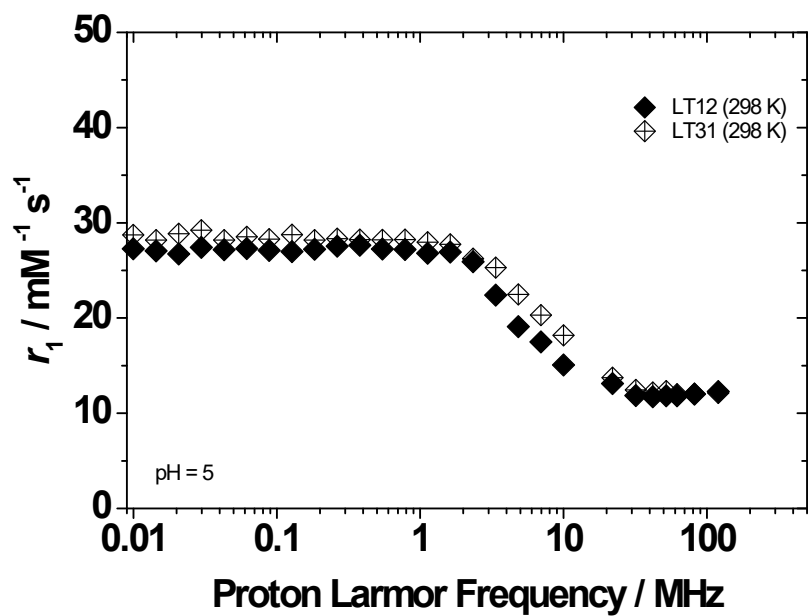

**Figure S6:**  $^1\text{H}$   $T_1$  NMRD profiles of Gd- $\text{F}_4\text{BDC}$  NPs (LT31) compared to Gd- $\text{F}_4\text{BDC}$  Single crystals (LT12)
